# Supplementary material
Source: publisher site journal article supplement (https://cdn.jamanetwork.com/ama/content_public/journal/intemed/927580/ild130119supp1_prod.pdf)
Supplement: Supplementary file 1 [file ild130119supp1_prod.pdf]

## Supplementary Online Content

Hauptman PJ, McCann P, Ramirez Romero JM, Mayo M. Reference laboratory values for digoxin following publication of Digitalis Investigation Group (DIG) trial data. *JAMA Internal Med*. Published online June 24, 2013. doi:10.1001/jamainternmed.2013.7756.

**eSupplement.** Digoxin survey

This supplementary material has been provided by the authors to give readers additional information about their work.

# eSupplement

## DIGOXIN SURVEY

1 Your professional title (e.g. Medical Director): \_\_\_\_\_

2 Please name the commercial assay used to determine serum dig levels: \_\_\_\_\_

3 Has there been any change in assay used within the last year? Yes  No

3a If answered yes:  
provide name of prior assay: \_\_\_\_\_  
explain why assay was changed: \_\_\_\_\_

Cost  Improved assay  Other   
sensitivity  
Other (specify): \_\_\_\_\_

4 Provide "normal range" for serum dig levels as listed on lab report at your institution (ng/ml): \_\_\_\_\_

5 Has there been any change in assay used within the last year? Yes  No

5a If answered yes:  
provide prior normal range: \_\_\_\_\_  
explain why range was changed: \_\_\_\_\_

Clinician  lab decision based  Other   
request on literature reading  
Other (specify): \_\_\_\_\_

6 Calculate/provide if possible, mean (SD) of serum dig levels measured at your institution:  
6a Specific period of time during which this value was calculated

Mean  SD  Cannot calculate   
1 day  1 week  1 month   
3 months  Other (specify): \_\_\_\_\_

7 Over the same period as described in #5, approx what percent of levels that exceed: (indicate in %) 1.5 ng/ml  2.5 ng/ml  5.0 ng/ml

8 Do you believe that efficacy of digoxin is correlated with the serum level when drug is used for treatment of Heart Failure? Yes  No  Don't know

8a If yes, specify the range associated with efficacy: \_\_\_\_\_

Yes  No

***I wish to receive a copy of the study results:***

***If you answered yes, please provide your contact info:***

Name:  
Address:

Please send completed survey as an attached Word file or PDF document to pmccann1@slu.edu or fax to 314-270-5286, or mail to Patrick McCann, MD, St. Louis University Hospital, Cardiology 13th floor, 3635 Vista Avenue, St. Louis, MO 63110
